# Supplementary material for: Automatically extracting social determinants of health for suicide: a narrative literature review
Source: PubMed Central journal article supplement — Npj Ment Health Res. 2024 Nov 6;3:51. doi: 10.1038/s44184-024-00087-6 (PMC11541747; doi:10.1038/s44184-024-00087-6), 2024-11-06
Supplement: 44184_2024_87_MOESM1_ESM.pdf [file 44184_2024_87_MOESM1_ESM.pdf]

|                                                | Type                      | Papers                                                                                                                                                                                                                                                                                                     |
|------------------------------------------------|---------------------------|------------------------------------------------------------------------------------------------------------------------------------------------------------------------------------------------------------------------------------------------------------------------------------------------------------|
| Socio - demographic                            | Age                       | 73,74, 79, 80, 84, 86, 88, 91, 92, 95, 96, 97, 98, 99, 100, 102, 103, 104, 105, 106, 108, 110, 113, 114, 115, 116, 117, 118, 120, 121, 123, 124, 125, 127, 129, 130, 131, 133, 134, 136, 137, 138, 139, 140, 141, 143, 145, 146, 149, 150, 152, 153, 155, 156, 157, 158, 160, 161, 162, 163, 164, 166, 167 |
|                                                | Gender                    | 73, 74, 84, 85, 91, 92, 94, 97, 100, 114, 116, 117, 118, 122, 124, 127, 131, 134, 136, 137, 141, 144, 146, 149, 150, 156, 157, 158, 163, 166, 167                                                                                                                                                          |
|                                                | Sex                       | 78, 79, 80, 82, 86, 95, 96, 99, 102, 103, 104, 105, 106, 108, 110, 113, 120, 123, 125, 129, 130, 132, 133, 138, 139, 140, 143, 145, 152, 153, 154, 155, 160, 161, 164                                                                                                                                      |
|                                                | Race                      | 73, 74, 78, 79, 80, 86, 91, 92, 94, 95, 97, 99, 100, 101, 102, 103, 104, 105, 106, 107, 108, 110, 112, 115, 116, 117, 118, 120, 122, 124, 125, 129, 130, 133, 134, 137, 138, 140, 143, 144, 146, 149, 153, 154, 156, 157, 160, 161, 162, 163, 164, 166, 167                                                |
|                                                | Ethnicity                 | 73, 74, 78, 80, 84, 86, 91, 92, 96, 97, 99, 100, 101, 102, 103, 104, 105, 106, 107, 108, 110, 111, 113, 114, 116, 117, 118, 120, 123, 124, 129, 132, 133, 134, 137, 140, 143, 144, 146, 149, 150, 152, 153, 155, 156, 157, 160, 161, 162, 163, 164, 166, 167                                               |
|                                                | Sexuality                 | 84, 86, 136, 149, 156, 161, 165                                                                                                                                                                                                                                                                            |
|                                                | Disability                | 99, 121, 139, 162                                                                                                                                                                                                                                                                                          |
|                                                | Marital Status            | 74, 77, 78, 92, 94, 95, 96, 99, 100, 102, 103, 104, 105, 107, 108, 110, 111, 112, 114, 116, 120, 121, 124, 138, 142, 143, 150, 156, 163                                                                                                                                                                    |
| Physical, mental and behavioral health factors | Physical health condition | 72, 74, 76, 77, 82, 86, 88, 91, 92, 93, 94, 95, 97, 99, 100, 102, 103, 104, 105, 107, 108, 111, 112, 114, 115, 116, 118, 119, 121, 123, 125, 127, 130, 133, 134, 138, 139, 142, 145, 146, 149, 150, 153, 155, 156, 158, 162, 164, 165, 166, 167                                                            |

|  |                         |                                                                                                                                                                                                                                                                                                                                                                                       |
|--|-------------------------|---------------------------------------------------------------------------------------------------------------------------------------------------------------------------------------------------------------------------------------------------------------------------------------------------------------------------------------------------------------------------------------|
|  | Mental health condition | 70, 72, 73, 74, 76, 77, 78, 79, 80, 82, 84, 85, 89, 91, 92, 93, 94, 95, 97, 99, 100, 102, 103, 104, 105, 106, 107, 108, 109, 110, 111, 112, 113, 114, 115, 116, 117, 118, 119, 120, 121, 122, 123, 124, 125, 126, 127, 129, 130, 131, 132, 133, 134, 135, 136, 138, 139, 140, 142, 143, 144, 145, 146, 147, 149, 150, 152, 153, 155, 156, 157, 158, 160, 161, 162, 164, 165, 166, 167 |
|  | Neurocognitive health   | 73, 84, 92, 96, 97, 108, 121, 123, 143, 146, 150, 153, 164                                                                                                                                                                                                                                                                                                                            |
|  | Psychiatric medication  | 73, 80, 82, 94, 97, 98, 99, 102, 106, 112, 116, 117, 118, 119, 122, 123, 133, 134, 139, 140, 142, 146, 149, 150, 155, 164, 166, 167                                                                                                                                                                                                                                                   |
|  | Sleep                   | 70, 72, 79, 89, 119, 123, 126, 132, 135, 150, 157, 159, 161, 162, 166                                                                                                                                                                                                                                                                                                                 |
|  | Self-harm               | 70, 72, 73, 75, 80, 82, 86, 92, 93, 101, 107, 109, 111, 116, 117, 119, 121, 122, 129, 131, 132, 134, 143, 144, 146, 147, 150, 152, 154, 155, 156, 159                                                                                                                                                                                                                                 |
|  | Treatment in Hospital   | 80, 91, 94, 95, 108, 112, 118, 119, 121, 122, 123, 128, 140, 146, 152, 155, 158, 164, 166, 167                                                                                                                                                                                                                                                                                        |
|  | Previous attempt        | 70, 72, 75, 76, 78, 80, 93, 94, 96, 97, 99, 100, 105, 108, 109, 111, 114, 117, 118, 122, 127, 130, 131, 132, 133, 134, 136, 138, 140, 143, 144, 145, 146, 150, 152, 154, 156, 158, 159, 161, 162, 163, 164, 167                                                                                                                                                                       |
|  | Aggression              | 73, 84, 134, 137, 145, 150, 158, 160                                                                                                                                                                                                                                                                                                                                                  |
|  | Risky behavior          | 83, 84, 95, 96, 105, 115, 119, 129, 130, 134, 150, 156, 158, 162, 165, 166                                                                                                                                                                                                                                                                                                            |
|  | Substance Use           | 70, 72, 73, 76, 78, 79, 82, 87, 91, 92, 93, 94, 96, 97, 99, 100, 102, 103, 104, 105, 106, 108, 109, 110, 111, 114, 115, 116, 119, 121, 122, 123, 124, 127, 128, 129, 130, 131, 132, 133, 134, 137, 138, 140, 146, 147, 150, 152, 154, 155, 156, 158, 159, 161, 164, 165, 166                                                                                                          |
|  | Physical activity       | 77, 96, 105, 110, 126, 135, 149, 157, 159, 162                                                                                                                                                                                                                                                                                                                                        |

|          |                                   |                                                                                                                                                                   |
|----------|-----------------------------------|-------------------------------------------------------------------------------------------------------------------------------------------------------------------|
| Economic | Healthcare                        | 75, 79, 80, 93, 95, 105, 115, 123, 139, 140, 152, 155, 163, 164, 167                                                                                              |
|          | Education                         | 84, 111, 113, 115, 120, 124, 130, 131, 136, 137, 138, 141, 143, 144, 149, 150, 156, 157, 161, 166                                                                 |
|          | Occupation                        | 72, 74, 86, 90, 94, 96, 99, 100, 103, 104, 105, 109, 110, 111, 114, 115, 116, 120, 123, 124, 128, 131, 132, 138, 141, 142, 149, 156, 157, 163                     |
|          | Employment Status                 | 77, 78, 96, 99, 103, 105, 110, 111, 114, 115, 120, 121, 122, 123, 124, 128, 132, 134, 138, 141, 149, 150, 156, 161                                                |
|          | Socioeconomic                     | 72, 77, 78, 79, 85, 92, 96, 100, 103, 104, 105, 111, 113, 114, 117, 118, 120, 121, 122, 127, 128, 130, 131, 133, 138, 143, 146, 149, 150, 153, 156, 161, 162, 166 |
|          | Housing                           | 96, 105, 130, 131, 146, 149, 162, 166                                                                                                                             |
|          | Homelessness                      | 77, 121, 146                                                                                                                                                      |
|          | Neighborhood                      | 73, 80, 84, 92, 94, 98, 100, 102, 103, 104, 105, 111, 112, 113, 114, 116, 121, 122, 123, 130, 134, 137, 140, 146, 149, 150, 156, 161, 162                         |
|          | Food                              | 96, 105                                                                                                                                                           |
| Social   | Culture                           | 74, 101, 113, 114, 122, 123, 131, 134                                                                                                                             |
|          | Religion                          | 74, 120, 131, 137, 166                                                                                                                                            |
|          | Relationships                     | 70, 77, 83, 88, 95, 96, 102, 103, 104, 105, 108, 110, 115, 120, 121, 124, 127, 130, 134, 136, 137, 138, 142, 145, 150, 153, 159, 160, 161, 165, 166               |
|          | Stigmatization (Belongingness)    | 89, 96, 114, 124, 132, 150, 159, 160                                                                                                                              |
|          | Discrimination (social exclusion) | 101, 114                                                                                                                                                          |
|          | Isolation/Loneliness              | 72, 82, 85, 89, 96, 106, 115, 121, 134, 145, 149, 150, 158, 161, 165, 166                                                                                         |

|              |                              |                                                                                                                  |
|--------------|------------------------------|------------------------------------------------------------------------------------------------------------------|
| Psychosocial | Adverse Life Events          | 70, 72, 77, 82, 83, 96, 103, 105, 107, 111, 115, 119, 120, 121, 124, 127, 131, 132, 134, 146, 156, 158, 159, 161 |
|              | Abuse (adult)                | 77, 82, 96, 103, 111, 115, 121, 132, 134, 137, 146, 156, 158, 161                                                |
|              | Trauma (adult)               | 70, 77, 82, 103, 105, 111, 115, 119, 120, 124, 131, 132, 134, 146, 156, 158, 159, 161                            |
|              | Legal Issues                 | 96, 103, 105, 114, 120, 146, 156                                                                                 |
|              | Adverse childhood experience | 73, 77, 82, 84, 103, 110, 114, 115, 121, 123, 129, 130, 132, 134, 138, 145, 146, 150, 156, 158, 161, 165, 166    |
|              | Legal Issues (childhood)     | 121, 145, 165                                                                                                    |
|              | Abuse / Trauma (childhood)   | 77, 82, 84, 123, 134, 146, 150, 156, 161, 165, 166                                                               |

*Supplementary Table 1: All papers in our collection referenced according to the SDoH information used.*

[4] Bozorgmehr, A., Ghadirivasfi, M., Tavakoli, M., Rahmani, H., Heydari, F. and Ananloo, E.S., 2018. Integrated analysis of the genetic basis of suicidal behavior: what has been shown by structural genetic studies so far. *Psychiatric genetics*, 28(2), pp.31-37.

[5] Rzeszutek, M.J., DeFulio, A. and Sylvester, G.E., 2022. A systematic review of behavior-outcome psychological assessments as correlates of suicidality. *Archives of suicide research*, 26(4), pp.1757-1793.

[6] Mula, M. and Sander, J.W., 2013. Suicide risk in people with epilepsy taking antiepileptic drugs. *Bipolar disorders*, 15(5), pp.622-627.

[7] Swain, R.S., Taylor, L.G., Braver, E.R., Liu, W., Pinheiro, S.P. and Mosholder, A.D., 2019. A systematic review of validated suicide outcome classification in observational studies. *International journal of epidemiology*, 48(5), pp.1636-1649.

[8] Betthausen, L.M., Hoffberg, A.S., Stearns-Yoder, K.A., Harmon, M., Coons, D. and Brenner, L.A., 2023. A systematic review of suicidal ideation and behaviors among adults with spinal cord injury. *The Journal of Spinal Cord Medicine*, 46(4), pp.602-613.

[9] Du, L., Shi, H.Y., Qian, Y., Jin, X.H., Li, Y., Yu, H.R., Liu, X.M., Fu, X.L. and Chen, H.L., 2021. Association between social support and suicidal ideation in patients with cancer: a systematic review and meta-analysis. *European Journal of Cancer Care*, 30(2), p.e13382.

[10] Raj, S., Ghosh, D., Verma, S.K. and Singh, T., 2021. The mindfulness trajectories of addressing suicidal behaviour: a systematic review. *International Journal of Social Psychiatry*, 67(5), pp.507-519.

[11] Wilcox, H.C., Kharrazi, H., Wilson, R.F., Musci, R.J., Susukida, R., Gharghabi, F., Zhang, A., Wissow, L. and Robinson, K.A., 2016. Data linkage strategies to advance youth suicide prevention: a systematic review for a National Institutes of health pathways to prevention workshop. *Annals of internal medicine*, 165(11), pp.779-785.

[12] Yates, K., Lång, U., Cederlöf, M., Boland, F., Taylor, P., Cannon, M., McNicholas, F., DeVlyder, J. and Kelleher, I., 2019. Association of psychotic experiences with subsequent risk of suicidal ideation, suicide attempts, and suicide deaths: a systematic review and meta-analysis of longitudinal population studies. *JAMA psychiatry*, 76(2), pp.180-189.

[14] Sufate-Sorzano, T., Juárez-Vela, R., Ramírez-Torres, C.A., Rivera-Sanz, F., Garrote-Camara, M.E., Roland, P.P., Gea-Sánchez, M., Del Pozo-Herce, P., Gea-Caballero, V., Angulo-Nalda, B. and Santolalla-Arnedo, I., 2022.

Nursing interventions of choice for the prevention and treatment of suicidal behaviour: The umbrella review protocol. *Nursing open*, 9(1), pp.845-850.

[15] Kryszka, K., Westerlund, M., Niederkrotenthaler, T., Andriessen, K., Carli, V., Hadlaczky, G., Till, B. and Wasserman, D., 2017. A mapping study on the internet and suicide. *Crisis: The Journal of Crisis Intervention and Suicide Prevention*, 38(4), p.217.

[16] Torous, J., Larsen, M.E., Depp, C., Cosco, T.D., Barnett, I., Nock, M.K. and Firth, J., 2018. Smartphones, sensors, and machine learning to advance real-time prediction and interventions for suicide prevention: a review of current progress and next steps. *Current psychiatry reports*, 20, pp.1-6.

[17] Martínez-Alés, G. and Keyes, K.M., 2019. Fatal and non-fatal self-injury in the USA: Critical review of current trends and innovations in prevention. *Current psychiatry reports*, 21, pp.1-11.

[18] Benson, R., Rigby, J., Brunson, C., Cully, G., Too, L.S. and Arensman, E., 2022. Quantitative methods to detect suicide and self-harm clusters: a systematic review. *International journal of environmental research and public health*, 19(9), p.5313.

[21] Elman, I., Borsook, D. and Volkow, N.D., 2013. Pain and suicidality: insights from reward and addiction neuroscience. *Progress in neurobiology*, 109, pp.1-27.

[22] De la Cruz-Cano, E., 2017. Association between FKBP5 and CRHR1 genes with suicidal behavior: A systematic review. *Behavioural brain research*, 317, pp.46-61.

[23] Xiong, Q., Tang, F., Li, Y., Xie, F., Yuan, L., Yao, C., Wu, R., Wang, J., Wang, Q. and Feng, P., 2022. Association of inflammatory bowel disease with suicidal ideation, suicide attempts, and suicide: A systematic review and meta-analysis. *Journal of psychosomatic research*, 160, p.110983.

[24] Chen, F., Chi, J., Niu, F., Gao, Q., Mei, F., Zhao, L., Hu, K., Zhao, B. and Ma, B., 2022. Prevalence of suicidal ideation and suicide attempt among patients with traumatic brain injury: a meta-analysis. *Journal of affective disorders*, 300, pp.349-357.

[25] Batterham, P.J., Ftanou, M., Pirkis, J., Brewer, J.L., Mackinnon, A.J., Beautrais, A., Fairweather-Schmidt, A.K. and Christensen, H., 2015. A systematic review and evaluation of measures for suicidal ideation and behaviors in population-based research. *Psychological assessment*, 27(2), p.501.

- [26] Meurk, C., Wittenhagen, L., Lucke, J., Barker, R., Roberts, S., Moss, K., Waterson, E. and Heffernan, E., 2021. Suicidal behaviours in the peripartum period: a systematic scoping review of data linkage studies. *Archives of women's mental health*, 24, pp.579-593.
- [27] Wei, H., Li, Y., Lei, H. and Ren, J., 2023. Associations of migraines with suicide ideation or attempts: A meta-analysis. *Frontiers in public health*, 11, p.1140682.
- [28] Schafer, K.M., Kennedy, G., Gallyer, A. and Resnik, P., 2021. A direct comparison of theory-driven and machine learning prediction of suicide: A meta-analysis. *PLoS one*, 16(4), p.e0249833.
- [29] Qu, G., Shu, L., Zhang, J., Wu, Y., Ma, S., Han, T., Zhang, H., Wang, J. and Sun, Y., 2021. Suicide ideation, suicide plan, and suicide attempt among left-behind children and adolescents: A systematic review and meta-analysis. *Suicide and Life-Threatening Behavior*, 51(3), pp.515-527.
- [30] Watkins, H.B. and Meyer, T.D., 2013. Is there an empirical link between impulsivity and suicidality in bipolar disorders? A review of the current literature and the potential psychological implications of the relationship. *Bipolar Disorders*, 15(5), pp.542-558.
- [31] Christensen, H., Calear, A.L., Van Spijker, B., Gosling, J., Petrie, K., Donker, T. and Fenton, K., 2014. Psychosocial interventions for suicidal ideation, plans, and attempts: A database of randomised controlled trials. *BMC psychiatry*, 14(1), pp.1-6.
- [32] Lai, M.H., Maniam, T., Chan, L.F. and Ravindran, A.V., 2014. Caught in the web: a review of web-based suicide prevention. *Journal of medical Internet research*, 16(1), p.e30.
- [33] Mills, P.D., Watts, B.V. and Hemphill, R.R., 2014. Suicide attempts and completions on medical-surgical and intensive care units. *Journal of hospital medicine*, 9(3), pp.182-185.
- [34] Armstrong, M.J., Moore, K., Jacobson, C.E., Bedenfield, N., Patel, B. and Sullivan, J.L., 2021. Frequency of suicidal ideation and associated clinical features in Lewy body dementia. *Parkinsonism & related disorders*, 90, pp.33-37.
- [35] Franklin, J.C., Ribeiro, J.D., Fox, K.R., Bentley, K.H., Kleiman, E.M., Huang, X., Musacchio, K.M., Jaroszewski, A.C., Chang, B.P. and Nock, M.K., 2017. Risk factors for suicidal thoughts and behaviors: A meta-analysis of 50 years of research. *Psychological bulletin*, 143(2), p.187.

[40] Gilmour, L., Duncan, E. and Maxwell, M., 2018. Policy addressing suicidality in children and young people: a scoping review protocol. *BMJ open*, 8(9).

[41] Friedman, L.E., Gelaye, B., Bain, P.A. and Williams, M.A., 2017. A systematic review and meta-analysis of migraine and suicidal ideation. *The Clinical journal of pain*, 33(7), p.659.

[42] Kirtley, O.J., van Mens, K., Hoogendoorn, M., Kapur, N. and de Beurs, D., 2022. Translating promise into practice: a review of machine learning in suicide research and prevention. *The Lancet Psychiatry*, 9(3), pp.243-252.

[43] Shoib, S., Chandradasa, M., Nahidi, M., Amanda, T.W., Khan, S., Saeed, F., Swed, S., Mazza, M., Di Nicola, M., Martinotti, G. and Di Giannantonio, M., 2022. Facebook and suicidal behaviour: user experiences of suicide notes, live-streaming, grieving and preventive strategies—a scoping review. *International journal of environmental research and public health*, 19(20), p.13001.

[44] Notredame, C.E., Morgiève, M., Morel, F., Berrouiguet, S., Azé, J. and Vaiva, G., 2019. Distress, suicidality, and affective disorders at the time of social networks. *Current Psychiatry Reports*, 21, pp.1-11.

[47] Yerevanian, B.I. and Choi, Y.M., 2013. Impact of psychotropic drugs on suicide and suicidal behaviors. *Bipolar disorders*, 15(5), pp.594-621.

[51] Onie, S., Li, X., Liang, M., Sowmya, A. and Larsen, M.E., 2021. The use of closed-circuit television and video in suicide prevention: narrative review and future directions. *JMIR mental health*, 8(5), p.e27663.

[52] Ranapurwala, S.I., Miller, V.E., Carey, T.S., Gaynes, B.N., Keil, A.P., Fitch, K.V., Swilley-Martinez, M.E., Kavee, A.L., Cooper, T., Dorris, S. and Goldston, D.B., 2022. Innovations in suicide prevention research (INSPIRE): a protocol for a population-based case-control study. *Injury prevention*, 28(5), pp.483-490.

[53] Smith, W.R., Appelbaum, P.S., Lebowitz, M.S., Gülöksüz, S., Calkins, M.E., Kohler, C.G., Gur, R.E. and Barzilay, R., 2023. The Ethics of Risk Prediction for Psychosis and Suicide Attempt in Youth Mental Health. *The Journal of Pediatrics*, p.113583.

[54] Dang, L.N., Kahsay, E.T., James, L.N., Johns, L.J., Rios, I.E. and Mezuk, B., 2023. Research utility and limitations of textual data in the National Violent Death Reporting System: a scoping review and recommendations. *Injury epidemiology*, 10(1), pp.1-18.

[57] Hilario, C.T., Kamanzi, J., Kennedy, M., Gilchrist, L. and Richter, S., 2021. Peer support for youth suicide prevention: a scoping review protocol. *BMJ open*, 11(12), p.e048837.

[59] Wyder, M., Ray, M.K., Roennfeldt, H., Daly, M. and Crompton, D., 2020. How health care systems let our patients down: a systematic review into suicide deaths. *International Journal for Quality in Health Care*, 32(5), pp.285-291.



- [60] Allie, S.L.N., Bantjes, J. and Andriessen, K., 2023. Suicide postvention for staff and students on university campuses: a scoping review. *BMJ open*, 13(6), p.e068730.
- [62] Gee, B.L., Han, J., Benassi, H. and Batterham, P.J., 2020. Suicidal thoughts, suicidal behaviours and self-harm in daily life: A systematic review of ecological momentary assessment studies. *Digital health*, 6, p.2055207620963958.
- [64] Kouter, K. and Paska, A.V., 2021. 'Omics' of suicidal behaviour: A path to personalised psychiatry. *World journal of psychiatry*, 11(10), p.774.
- [66] McKernan, L.C., Clayton, E.W. and Walsh, C.G., 2018. Protecting life while preserving liberty: ethical recommendations for suicide prevention with artificial intelligence. *Frontiers in psychiatry*, 9, p.650.
- [67] Linthicum, K.P., Schafer, K.M. and Ribeiro, J.D., 2019. Machine learning in suicide science: Applications and ethics. *Behavioral sciences & the law*, 37(3), pp.214-222.
- [68] Luk, J.W., Pruitt, L.D., Smolenski, D.J., Tucker, J., Workman, D.E. and Belsher, B.E., 2022. From everyday life predictions to suicide prevention: Clinical and ethical considerations in suicide predictive analytic tools. *Journal of clinical psychology*, 78(2), pp.137-148.
- [71] Aladağ, A.E., Muderrisoglu, S., Akbas, N.B., Zahmacioglu, O. and Bingol, H.O., 2018. Detecting suicidal ideation on forums: proof-of-concept study. *Journal of medical Internet research*, 20(6), p.e9840.
- [73] Downs, J., Velupillai, S., George, G., Holden, R., Kikoler, M., Dean, H., Fernandes, A. and Dutta, R., 2017. Detection of suicidality in adolescents with autism spectrum disorders: developing a natural language processing approach for use in electronic health records. In *AMIA annual symposium proceedings* (Vol. 2017, p. 641). American Medical Informatics Association.
- [81] Kao, A. and Poteet, S.R., 2019. Identifying suicidal adolescents from mental health records using natural language processing. In *Proc. ACM SIGART Bull.* (pp. 1-7).
- [101] Goldstein, E.V., Bailey, E.V. and Wilson, F.A., 2022. Discrimination and Suicidality Among Hispanic Mental Health Patients, 2010–2020: A Natural Language Processing Approach. *Psychiatric services*, 73(11), pp.1313-1314.
- [104] Kafka, J.M., Fliss, M.D., Trangenstein, P.J., Reyes, L.M., Pence, B.W. and Moracco, K.E., 2023. Detecting intimate partner violence circumstance for suicide: development and validation of a tool using natural language processing and supervised machine learning in the National Violent Death Reporting System. *Injury prevention*, 29(2), pp.134-141.
- [110] Levis, M., Levy, J., Dent, K.R., Dufort, V., Gobbel, G.T., Watts, B.V. and Shiner, B., 2023. Leveraging Natural Language Processing to Improve Electronic Health Record Suicide Risk Prediction for Veterans Health Administration Users. *The Journal of Clinical Psychiatry*, 84(4), p.47557.
- [120] Bernecker, S.L., Zuromski, K.L., Gutierrez, P.M., Joiner, T.E., King, A.J., Liu, H., Nock, M.K., Sampson, N.A., Zaslavsky, A.M., Stein, M.B. and Ursano, R.J., 2019. Predicting suicide attempts among soldiers who deny

suicidal ideation in the Army Study to Assess Risk and Resilience in Servicemembers (Army STARRS). *Behaviour research and therapy*, 120, p.103350.

[135] Carretero, P., Campana-Montes, J.J. and Artes-Rodriguez, A., 2020. Ecological momentary assessment for monitoring risk of suicide behavior. *Behavioral Neurobiology of Suicide and Self Harm*, pp.229-245.

[142] Reale, C., Novak, L.L., Robinson, K., Simpson, C.L., Ribeiro, J.D., Franklin, J.C., Ripperger, M. and Walsh, C.G., 2020. User-centered design of a machine learning intervention for suicide risk prediction in a military setting. In *AMIA annual symposium proceedings* (Vol. 2020, p. 1050). American Medical Informatics Association.

[148] Lozupone, M., Donghia, R., Sardone, R., Mollica, A., Berardino, G., Lampignano, L., Griseta, C., Zupo, R., Castellana, F., Bortone, I. and Dibello, V., 2022. Apolipoprotein E genotype, inflammatory biomarkers, and non-psychiatric multimorbidity contribute to the suicidal ideation phenotype in older age. The Salus in Apulia Study. *Journal of Affective Disorders*, 319, pp.202-212.

[151] Park, H. and Lee, K., 2022. Using Boosted Machine Learning to Predict Suicidal Ideation by Socioeconomic Status among Adolescents. *Journal of Personalized Medicine*, 12(9), p.1357.

[168] Callahan, S.T., Fuchs, D.C., Shelton, R.C., Balmer, L.S., Dudley, J.A., Gideon, P.S., DeRanieri, M.M., Stratton, S.M., Williams, C.L., Ray, W.A. and Cooper, W.O., 2013. Identifying suicidal behavior among adolescents using administrative claims data. *Pharmacoepidemiology and drug safety*, 22(7), pp.769-775.

[180] Brooks, J.R., Hong, J.H., Cheref, S. and Walker, R.L., 2020. Capability for suicide: Discrimination as a painful and provocative event. *Suicide and Life-Threatening Behavior*, 50(6), pp.1173-1180.

[181] Castle, K., Conner, K., Kaukeinen, K. and Tu, X., 2011. Perceived racism, discrimination, and acculturation in suicidal ideation and suicide attempts among black young adults. *Suicide and Life-Threatening Behavior*, 41(3), pp.342-351.

[182] Khazem, L.R., 2018. Physical disability and suicide: recent advancements in understanding and future directions for consideration. *Current opinion in psychology*, 22, pp.18-22.

[190] Simon, G.E., Matarazzo, B.B., Walsh, C.G., Smoller, J.W., Boudreaux, E.D., Yarborough, B.J.H., Shortreed, S.M., Coley, R.Y., Ahmedani, B.K., Doshi, R.P. and Harris, L.I., 2021. Reconciling statistical and clinicians' predictions of suicide risk. *Psychiatric services*, 72(5), pp.555-562
